# Supplementary material for: Apolipoprotein E-depletion accelerates arterial fat deposition in the spontaneously hypertensive rat
Source: PubMed Central journal article supplement — Exp Anim. 2023 Apr 20;72(4):439–45. doi: 10.1538/expanim.23-0012 (PMC10658095; doi:10.1538/expanim.23-0012), 2023-04-20
Supplement: expanim-72-439-s001.pdf [file expanim-72-439-s001.pdf]

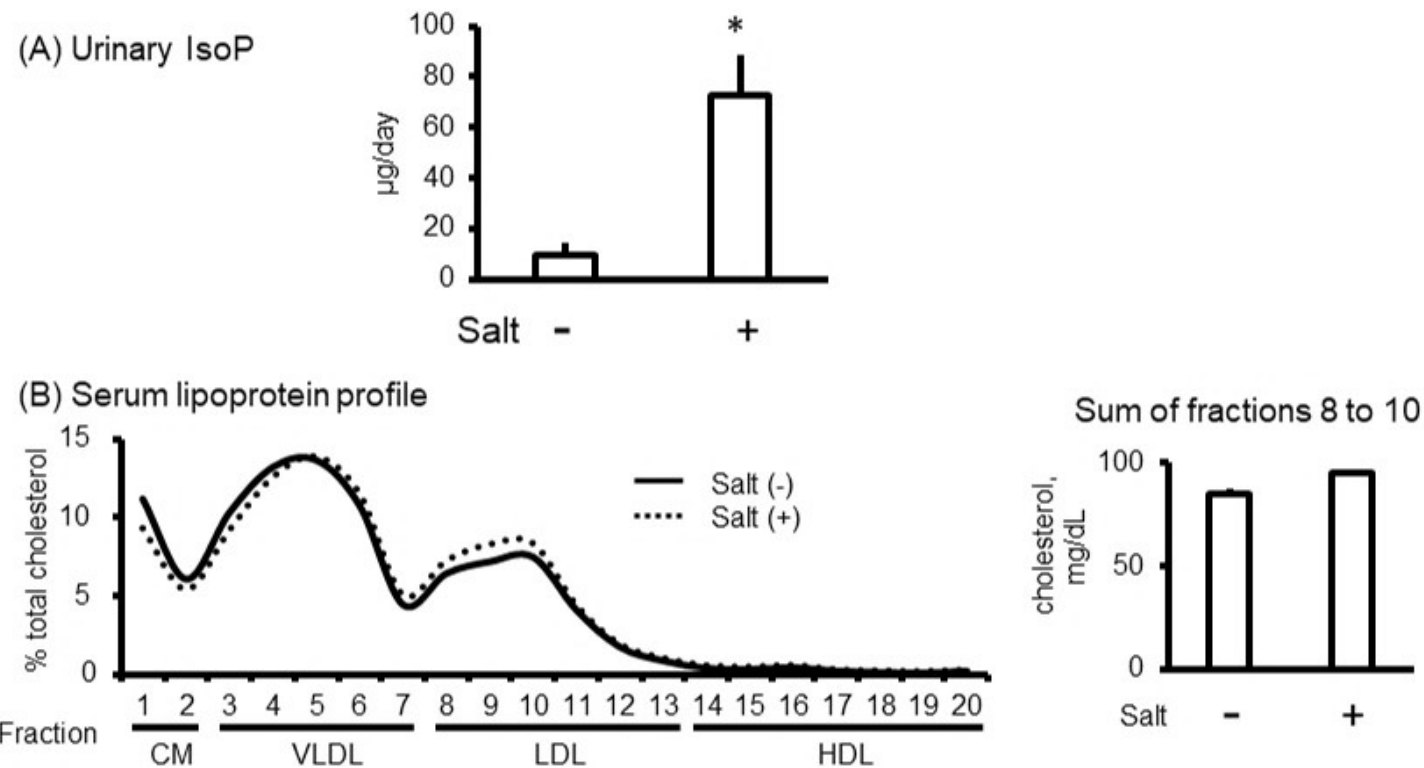

Supplementary Fig. 3. Effects of salt loading on urinary IsoP and the serum lipoprotein profile in  $SHR^{ApoE(-/-)}$ .

(A) The effect of salt loading on urinary IsoP excretion in  $SHR^{ApoE(-/-)}$ . IsoP excreted in 24-h urine was measured by ELISA as described in Methods. Each column and error bar indicates mean and SD, respectively. \*:  $p < 0.05$  vs. Salt (-). (B) The effect of salt loading on serum lipoprotein profile in  $SHR^{ApoE(-/-)}$ . Slight difference between Salt (-) and (+) is observed in the fractions 8-10. Sums of cholesterol levels in the fractions 8 to 10 are, however, not significantly different from each other as shown in the right panel.

Supplementary Table 1. Blood pressure, heart rate and body weight of SHR, SHR<sup>ApoE(-/-)</sup> and SHR<sup>ApoE(-/-)Prdx2(-/-)</sup>

|            | SHR     |      | SHR <sup>ApoE(-/-)</sup> |      | SHR <sup>ApoE(-/-)Prdx2(-/-)</sup> |      | P     |
|------------|---------|------|--------------------------|------|------------------------------------|------|-------|
| N          | 8       |      | 18                       |      | 18                                 |      |       |
| SBP (mmHg) | 177.4 ± | 8.1  | 163.6 ±                  | 12.3 | 168.4 ±                            | 19.0 | 0.305 |
| HR (bpm)   | 364.2 ± | 29.4 | 346.3 ±                  | 26.3 | 344.4 ±                            | 26.0 | 0.965 |
| BW (g)     | 294.0 ± | 10.3 | 279.2 ±                  | 13.2 | 277.9 ±                            | 19.0 | 0.067 |

All the parameters were measured at 12 weeks of age in male rats. No significant differences in body weight (BW), heart rate (HR) or systolic blood pressure (SBP) were observed among the three strains.
